# Supplementary material for: Prognostic value of tumor-infiltrating lymphocytes for patients with completely resected stage IIIA(N2) non-small cell lung cancer
Source: PubMed Central journal article supplement (PMC4872781; doi:10.18632/oncotarget.6979), 2016-01-22
Supplement: oncotarget-07-7227-s001.pdf [file oncotarget-07-7227-s001.pdf]

# Prognostic value of tumor-infiltrating lymphocytes for patients with completely resected stage IIIA(N2) non-small cell lung cancer

## Supplementary Materials

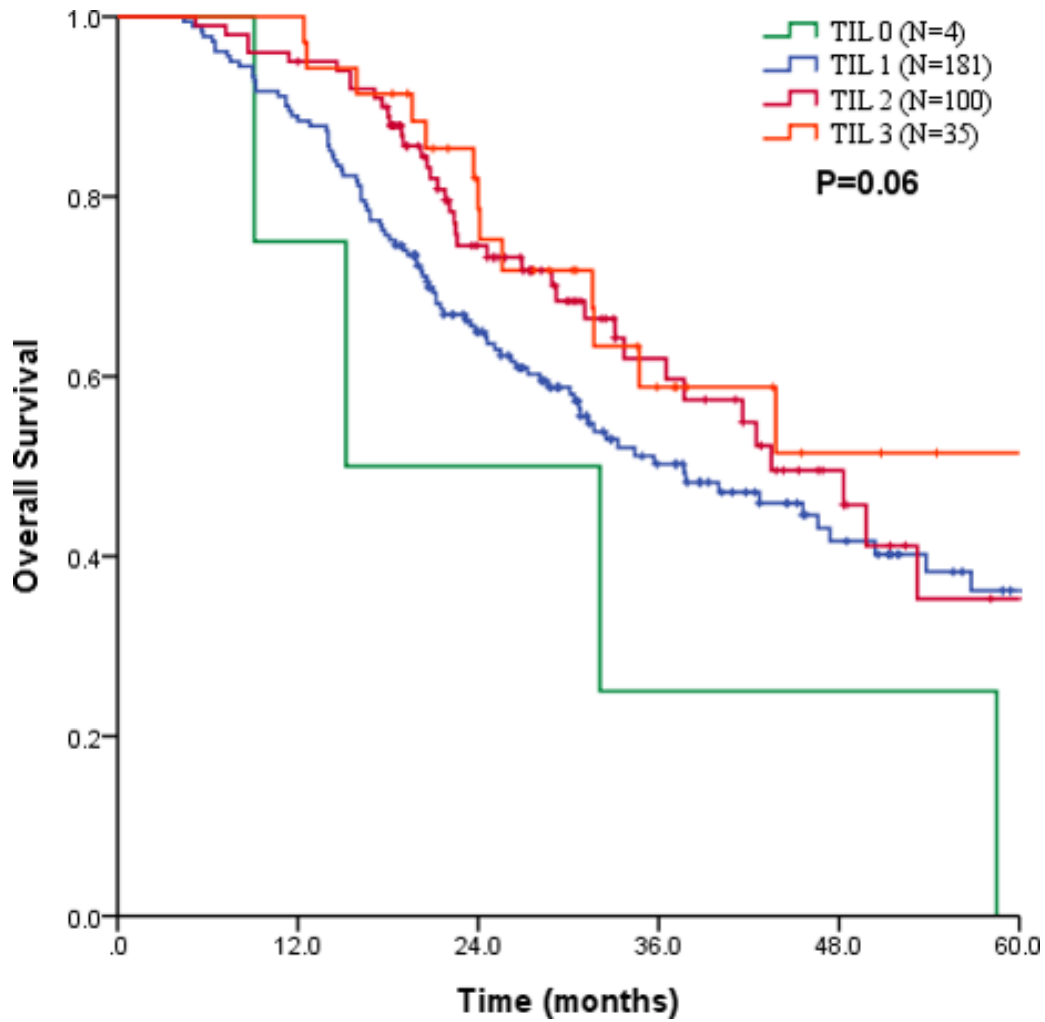

Supplementary Figure S1: Plot of the overall survival for all patients stratified into the four-scale TIL groups.

**Supplementary Table S1: Correction of the TIL density level with the clinicopathological characteristics of patients with SCC tumors**

| Characteristics                                                | TILs level     |
|----------------------------------------------------------------|----------------|
|                                                                | <i>P</i> value |
| Gender, male/female                                            | 0.06           |
| Age, $\leq 60 / > 60$ years                                    | 0.15           |
| Smoking history, Never or light smoker/current or heavy smoker | 0.47           |
| Tumor differentiation, well or Intermediate/poor               | 0.81           |
| Angiolymphatic invasion, ALI-/ALI+                             | 0.69           |
| Numbers of lymph node resected, $\leq 20 / > 20$               | 0.2            |
| Numbers of lymph node involved, $\leq 4 / > 4$                 | 0.26           |
| Pathologic T stage, T1/T2/T3                                   | 0.18           |
